# Supplementary material
Source: publisher site journal article supplement (https://www.spandidos-publications.com/5048/downloadSupplementary)

Figure S1. Kaplan-Meier curves for TFS after PMSA (12 pairs, 24 patients). PMSA, propensity score matching analysis; TFS, time to failure of strategy.

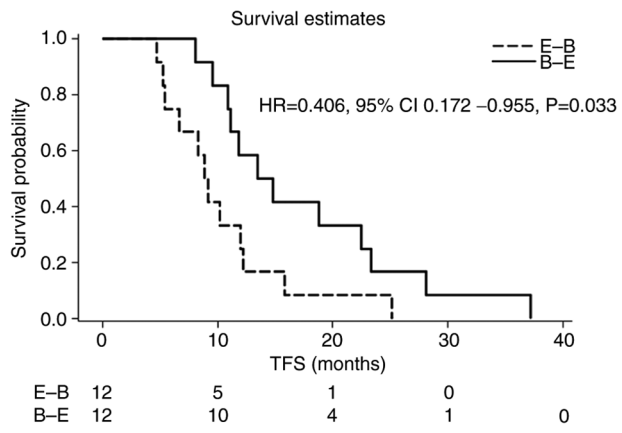

Figure S2. Kaplan-Meier curves for TFS after PMSA (ER+). PMSA, propensity score matching analysis; TFS, time to failure of strategy.

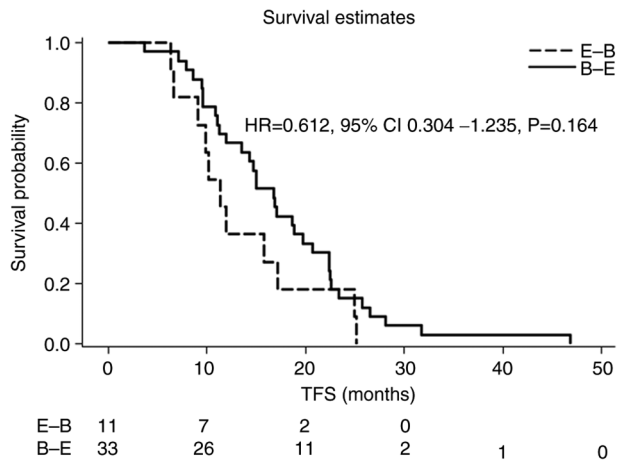

Figure S3. Kaplan-Meier curves for OS after PMSA (ER+). PMSA, propensity score matching analysis; OS, overall survival.

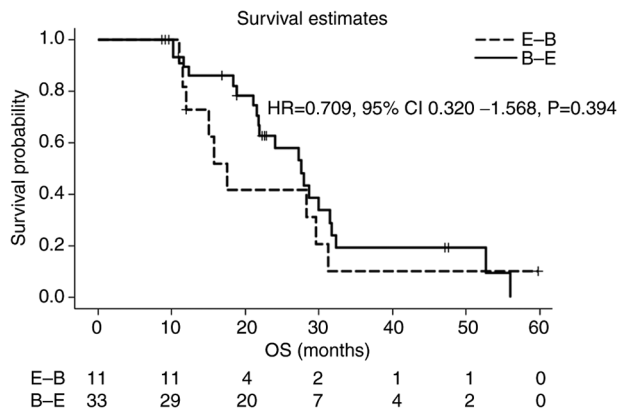

Supplement: Supplementary file 1 [file downloadSupplementary]
